# Supplementary material
Source: publisher figshare collection journal article supplement (https://karger.figshare.com/ndownloader/files/14570045)
Supplement: Supplementary file 1 [file 14570045]

| Supplementary table 1. Details, maternal basic demographics, prenatal ultrasonographic features, delivery and neonatal outcome of each publication. | | | | | | | | | | | | | | |
| --- | --- | --- | --- | --- | --- | --- | --- | --- | --- | --- | --- | --- | --- | --- |
|  | Author | Year of publication | Demographic | Gestational age at presentation (weeks) and fetal sex | Possible underlying aetiology | Ultrasonographic features | Suspect SDH before MRI | Use of MRI | Potential role of MRI | Diagnosis to delivery | Mode of delivery | Prenatal Treatment | Neonatal treatment | Neonatal outcome at last follow up |
| 1 | Hirose | 2001 | 28 yo  G2P1 | 28  female | Vitamin K deficiency  (Crohn disease) | 1.Intracranial mass.  2. Midline shift | No | Yes | Confirmed USG findings | 8 weeks | Caesarean | Maternal Vitamin K | nil | Normal neurology at 3 months of age |
| 2 | Sakai | 2003 | 28 yo  G2P1 | 31  male | Vitamin K deficiency  (Total parental nutrition) | 1. Increased fetal head measurement  2. Intracranial echogenicity  3. Reverse diastolic flow in the middle cerebral artery | Yes | No | No | 0 | Caesarean | nil | 1. Exchange transfusion  2. Vitamin K | Flaccid tetraplegia at 12 months |
| 3 | Sasaki | 2017 | 31 yo  G2P0 | 28  Female | Vitamin K deficiency  (severe vomiting reflux esophagitis) | 1. Increased fetal head measurement  2. Intracranial echogenicity  3. Reverse diastolic flow in the middle cerebral artery | Yes | Yes | Confirmed USG findings | 2 days | Caesarean | Maternal Vitamin K | 1. Blood transfusions  2. Vitamin K | Normal neurology at 4 months of age |
| 4 | Fujiwara | 2014 | 27 yo  G2P1 | 31  Male | Use of warfarin | 1. Ventriculomegaly | No | Yes | Additional information and confirmed diagnosis | 5 weeks | Vaginal | Switch warfarin to heparin | 1. Blood transfusion  2. Fresh frozen plasma  3. Drainage of haematoma | Normal neurology at 4 months of age |
| 5 | Matsuda | 2003 | 28yo | 31  Male | Use of warfarin | 1. Intracranial echogenicity  2. Intracranial mass | No | Yes | Additional information and confirmed diagnosis | 5 days | Caesarean | Switch warfarin to heparin | nil | Normal neurology at 12 months |
| 6 | Oswal | 2008 | 27 yo | 24  N/A | Use of warfarin | 1. Intracranial echogenicity  2. Intracranial mass  3. ventriculomegaly  4. Midline shift | Yes | No | No | TOP | TOP | TOP | TOP | TOP |
| 7 | Lee | 2003 | 27 yo | 24  N/A | Use of warfarin | 1. Intracranial echogenicity  2. Intracranial mass  3. ventriculomegaly | Yes | Yes | Confirm US diagnosis | TOP | TOP | TOP | TOP | TOP |
| 8 | Robinson | 1980 | 18 yo G2 | 32  N/A | Use of warfarin | 1. Increased fetal head measurement | No | No | Additional information and confirm diagnosis | 2 weeks | Vaginal | Nil | Nil | Neonatal death at 3 hours |
| 9 | Bauder | 2009 | 47 yo | 32  Male | Use of low molecular weight heparin | 1. Intracranial echogenicity | No | No | Additional information and confirm diagnosis | 0 | Caesarean | Nil | 1. Blood transfusion  2. Fresh frozen plasma  3. Factor XIII concentrate  4. Drainage of haematoma | Left sided hemiparesis, right sided sensorineural hearing loss |
| 10 | de Spirlet | 2000 | 32 yo  G2P1 | 33  Male | Autoimmune thrombocytopenia | 1. Intracranial echogenicity  2. Reverse diastolic flow in the middle cerebral artery  3. Echogenic bowel | Yes | No | No | 0 | Caesarean | 1. Betamethasoe 0.5mg alternate day | 1. Platelet transfusion  2. Fresh frozen plasma  3. Drainage of haematoma | Neonatal death at 20 hours |
| 11 | Rios | 2012 | 35 yo  G1P0 | 24  Male | Autoimmune thrombocytopenia | 1. Intracranial echogenicity  2. Intracranial mass  3. Midline shift | Yes | No | No | 13 weeks | Caesarean | Nil | 1. Platelet transfusion  2. Drainage of haematoma | Normal neurology at 5 years |
| 12 | Meagher | 2002 | 26 yo  G3P3 | 20  Female | Alloimmune thrombocytopenia | 1. Intracranial mass  2. Echogenic bowel | No | Yes | Additional information and confirm diagnosis | 15 weeks | Caesarean | 1. Weekly intravenous immunoglobulin  2. Platelet Transfusion | Nil | Alive  ? Neurology |
| 13 | de Sousa | 1988 | G2P1 | 35  Female | Fetal homozygous X deficiency | 1. Intracranial fluid collection  2. Midline shift | Yes | No | No | 2 weeks | Caesarean | Nil | 1. Fresh frozen plasma  2. Factor IX concentrate  3. Drainage of haematoma | Died at 7 months  (due to intracranial heamorrhage) |
| 14 | Ghi | 2003 | N/A | 23  N/A | Trauma | 1. Ventriculomegaly | N/A | N/A | N/A | N/A | N/A | N/A | 1. Drainage of haematoma | Normal neurology at 10 months |
| 15 | Barozzino | 1998 | 25 yo  G4P1 | 30  Male | Trauma  (minor trauma) | 1. Intracranial echogenicity  2. Ventriculomegaly  3. Midline shift | Yes | No | No | 8 weeks | Caesarean | Nil | Nil | Normal neurology at 9 months |
| 16 | Matsushita | 2014 | 22 yo  G1P0 | 26  Female | Trauma  (Motor vehicle accident) | 1. Ventriculomegaly | No | Yes | Additional information and confirm diagnosis | 11 weeks | Vaginal | Nil | Nil | Cortical blind and quadriparesis at 3 years |
| 17 | Green-Thompson | 2005 | 23 yo  G2P1 | 32  Male | Trauma  (Fall) | 1. Ventriculomegaly  2. Feature of SDH | Yes | Yes | Additional information (additional haemorrhage) and confirm diagnosis | N/A | Vaginal | Nil | Nil | Normal neurology |
| 18 | Piastra | 2009 | 34 yo  G2P1 | 30  Male | Trauma  (Abdominal hit from daughter) | Normal scan | No | Yes | Additional information and confirm diagnosis | 7 weeks | Caesarean | Nil | 1. Vitamin K  2. Drainage of haematoma | Almost complete regression of the left motor deficit at 8 months |
| 19 | Zeina | 2013 | 33 yo  G?P4 | 28  N/A | Trauma  (Motor vehicle accident) | Not done  (CT confirmed subdural haematoma) | N/A | Yes | N/A | IUD | IUD | IUD | IUD | IUD |
| 20 | Paladini | 2005 | G1P0 | 21  N/A | Infratentorial dural sinus malformation of the torcula | 1. Ventriculomegaly  2. Intracranial echogenicity | Yes | Yes | Confirm USG diagnosis | TOP | TOP | TOP | TOP | TOP |
| 21 | Strigini | 2004 | 35 yo  G1P0 | 21  Male | Vascular anomalies | 1. Intracranial mass  2. Ventriculomegaly  3. Midline shift | No | Yes | Additional information and confirm diagnosis | TOP | TOP | TOP | TOP | TOP |
| 22 | Sohda | 1996 | 31 yo | 37  Male | Vascular anomalies | 1. Increased fetal head measurement  2. Ventriculomegaly  3. Intracranial echogenicity | No | Yes | Additional information and confirm diagnosis | 1 week | Caesarean | Nil | 1. Drainage of haematoma | Normal neurology at 13 months |
| 23 | Hanigan | 1985 | 21 yo  G?P2 | 30  N/A | Coagulopathy  (cardiac and liver failure secondary to premature closure of foramen ovale) | 1. Increased fetal head measurement  2. Intracranial fluid collection  3. Hydrops | Yes | No | No | 1 day | Caesarean | Nil | 1. Drainage of haematoma | Normal neurology at 3 months |
| 24 | Ghi | 2003 | N/A | 24  N/A | Coagulopathy (Intrauterine death of monochorionic twin) | 1. Ventriculomegaly | N/A | TOP | TOP | TOP | TOP | TOP | TOP | TOP |
| 25 | Kawabata | 1993 | 39 yo  G5P3 | 35  Male | Acute pancreatitis  No cause identified | 1. Intracranial echogenicity  2. Intracranial mass | No | Yes | Additional information and confirm diagnosis | IUD | IUD | IUD | IUD | IUD |
| 26 | Catanzarite | 1995 | N/A | 28  N/A | Maternal hypoxia  No cause identified | 1. Increased fetal head measurement  2. Intracranial echogenicity  3. Ventriculomegaly  4. Intraventricular haemorrhage | Yes | No | No | IUD | IUD | IUD | IUD | IUD |
| 27 | Gunn | 1985 | 34 yo  G3P2 | 36  Male | No cause identified | 1. Intracranial echogenicity  2. Intracranial mass  3. Ventriculomegaly | No | Yes | Additional information and confirm diagnosis | 4 weeks | Caesarean | Nil | Nil | Quadriparesis , development delay and bilateral optic atrophy at 7 months |
| 28 | Nogueira | 1992 | 38 yo  G13P11 | 33  Male | No cause identified | 1. Increased fetal head measurement | No | Yes | Additional information and confirm diagnosis | 10 days | Vaginal | Nil | 1. Drainage of haematoma  2. Shunt insertion | Spastic diplegia with delayed development at 14 months |
| 29 | Mateos | 1987 | 31 yo  G2P1 | 32  Male | No cause identified | 1. Increased fetal head measurement.  2. Intracranial mass  3. Midline shift | No | Yes | Additional information and confirm diagnosis | 3 weeks | Caesarean | Nil | 1. Drainage of haematoma | Neonatal death at 14 days |
| 30 | Pilalis | 2003 | 31 yo  G1P0 | 22  Female | No cause identified | 1. Intracranial echogenicity  2. Intracranial mass | Yes | Yes | To confirm US diagnosis | TOP | TOP | TOP | TOP | TOP |
| 31 | Batukan | 2002 | 30 yo G2P1 | 24  Female | No cause identified | 1. Intracranial echogenicity  2. Intracranial mass | Yes | Yes | Confirm US diagnosis | TOP | TOP | TOP | TOP | TOP |
| 32 | Abdelkader | 2017 | 29 yo | 36  N/A | No cause identified | 1. Feature of SDH  2. Intraventricular haemorrhage | Yes | Yes | Confirm US diagnosis | N/A | N/A | N/A | N/A | Cerebral palsy |
| 33 | Abdelkader | 2017 | 31 yo | 34  N/A | No cause identified | 1. Feature of SDH  2. Intraventricular haemorrhage | Yes | Yes | Confirm US diagnosis | N/A | N/A | N/A | N/A | Normal neurology |
| 34 | Abdelkader | 2017 | 38 yo | 29  N/A | No cause identified | 1. Feature of SDH | Yes | No | N/A | N/A | N/A | N/A | N/A | Normal neurology |
| 35 | Abdelkader | 2017 | 28 yo | 28  N/A | No cause identified | 1. Feature of SDH  2. Intraventricular haemorrhage | Yes | Yes | Confirm US diagnosis | N/A | N/A | N/A | N/A | Motor deficit |
| 36 | Abdelkader | 2017 | 33 yo | 28  N/A | No cause identified | 1. Feature of SDH | Yes | No | N/A | N/A | N/A | N/A | N/A | IUD |
| 37 | Demir | 1989 | 19 yo  G4P3 | 33  Female | No cause identified | 1. Increased fetal head measurement.  2. Ventriculomegaly | No | Yes | Additional information and confirm diagnosis | IUD | IUD | IUD | IUD | IUD |
| 38 | Akman | 2000 | N/A | 32  Male | No cause identified | 1. Ventriculomegaly | No | Yes | Additional information and confirm diagnosis | 2 weeks | Caesarean | Nil | 1. Drainage of haematoma | Moderate speech delay at 30 months |
| 39 | Rotmensch | 1991 | 37 yo  G4P3 | 32  Male | No cause identified | 1. Intracranial fluid collection  2. Intracranial echogenicity  3. Intracranial mass | Yes | Yes | Confirm US diagnosis | N/A | Caesarean | 1. Intrauterine transfusion  2. Intrauterine fresh frozen plasma | Nil | Neonatal death at 9 days |
| 40 | Saadi | 2013 | 24 yo | 28  N/A | No cause identified | 1. Intracranial fluid collection  2. Intracranial echogenicity | No | Yes | Additional information and confirm diagnosis | IUD | IUD | IUD | IUD | IUD |
| 41 | Breningstal | 2000 | N/A | 29  Male | No cause identified | 1. Increased fetal head measurement. | No | No | Additional information and confirm diagnosis | N/A | Caesarean | Nil | 1. Drainage of haematoma | Optic atrophy, bilateral hearing loss, spastic diplegia at 7 years old |
| 42 | Ben-Chetrit | 1991 | 36 yo  G4P3 | 30  Male | No cause identified | 1. Intracranial mass  2. Reverse diastolic flow in the middle cerebral artery | Yes | No | No | TOP | TOP | TOP | TOP | TOP |
| 43 | Green | 1999 | 27 yo  G2P0 | 32  Male | No cause identified | 1. Increased fetal head measurement.  2. Ventriculomegaly  3. Midline shift | Yes | Yes | To confirm US diagnosis | 2 weeks | Caesarean | Nil | 1. Blood transfusion  2. Drainage of haematoma | Mild right hemiplegia at 5 months |
| 44 | Lafont | 1999 | 28 yo  G?P3 | 31  Female | No cause identified | 1. Intracranial echogenicity | No | Yes | Additional information and confirm diagnosis | 5 weeks | Vaginal | Nil | 1. Drainage of haematoma | Normal neurology at 11 months |
| 45 | Present case | 2018 | 25 yo  G2P0 | 27  Female | No cause identified | 1. Midline shift  2. Intracranial fluid collection  3. Ventriculomegaly  4. Reverse diastolic flow in the middle cerebral artery  5. Elevated middle cerebral artery peak systolic velocity | Yes | Yes | To confirm US diagnosis | IUD | IUD | IUD | IUD | IUD |

SDH, subdural haematoma; MRI, magnestic resonance imaging; TOP, termination of pregnancy; IUD, intrauterine death; N/A, not applicable; yo, years old
